# Supplementary material for: Molecular Epidemiology and Baseline Resistance of Hepatitis C Virus to Direct Acting Antivirals in Croatia
Source: MDPI journal article supplement (doi:10.3390/pathogens11070808), 2022-07-19
Supplement: s1 [file s1]

**Table S1.** Outer primers for NS3, NS5A and NS5B amplification.

| REGION | SUBTYPE  | PRIMER DIRECTION | NUCLEOTIDE SEQUENCE (5'–3')  | GENOME POSITION* | REFERENCES                                 |
|--------|----------|------------------|------------------------------|------------------|--------------------------------------------|
| NS3    | 1a       | forward          | ATGGAGACCAAGCTCATCACGTGGG    | 3276–3300        | Dietz et al., 2015                         |
|        |          | reverse          | ACCCGCCGTCGGCAAGGAAGTTGCCGTA | 4227–4254        | Dietz et al., 2015                         |
|        | 1b       | forward          | TGGAGACYAAGMTCATYACSTGGG     | 3277–3300        | Gozlan et al., 2017                        |
|        |          | reverse          | CCARGACYGTGCCRATGCCCA        | 4321–4339        | Zhou et al., 2017                          |
|        | 3a       | forward          | TACGACCACCTAGCGCCAATG        | 3276–3297        | primer design (Ye et al., 2012)            |
|        |          | reverse          | GGGACCTTTGTGCTCTTAC          | 4045–4063        | primer design (Ye et al., 2012)            |
| NS5A   | 1a       | forward          | ACATCCTTGCAGGGTATGG          | 5890–5908        | Dietz et al., 2018                         |
|        |          | reverse          | GACCACAGGTGGTTCGTAG          | 7256–7274        | Dietz et al., 2018                         |
|        | 1b       | forward          | TGGATGAACCGGCTGATAG          | 6084–6102        | McCormick et al., 2015                     |
|        |          | reverse          | CCACAGGAGRTTGGCCTC           | 7023–7040        | McCormick et al., 2015                     |
|        | 3a       | forward          | TGGATGAACAGGCTCATYGC         | 6084–6103        | McCormick et al., 2015                     |
|        |          | reverse          | ATGTTRCTGCCCATCTCTTG         | 7044–7063        | McCormick et al., 2015                     |
| NS5B   | 1a       | forward          | CTYAGCGACGGRTCRT             | 7539–7554        | Peres-da-Silva, de Almeida and Lampe, 2017 |
|        |          | reverse          | TCACGGGTRAGGTARTAGAC         | 8742–8761        | Peres-da-Silva, de Almeida and Lampe, 2017 |
|        | 1b       | forward          | TCYTGGTCTACYGTRAG            | 7551–7568        | Peres-da-Silva, de Almeida and Lampe, 2017 |
|        |          | reverse          | AGGARCATGATGTTATCARCTC       | 8682–8703        | Peres-da-Silva, de Almeida and Lampe, 2017 |
|        | 3a       | forward          | GCTCGTCTATGCCTCCTCTC         | 7497–7517        | primer design (Ye et al., 2012)            |
|        |          | reverse          | AAGGTCGTAAGTGGCCTGTG         | 8673–8693        | primer design (Ye et al., 2012)            |
|        | 1a/1b/3a | forward          | TATGAYACCCGCTGYTTYGA         | 8256–8275        | Akaberi et al., 2018                       |
|        |          | reverse          | GGGCAYGHGACABGCTGTGA         | 9284–9303        | Akaberi et al., 2018                       |

\*: according to H77 reference sequence (*GenBank* accession number: AF009606)

**Table S2.** Inner primers for nested NS3, NS5A and NS5B amplification and sequencing.

| REGION | SUBTYPE  | PRIMER DIRECTION | NUCLEOTIDE SEQUENCE (5'-3') | GENOME POSITION* | REFERENCES                                 |
|--------|----------|------------------|-----------------------------|------------------|--------------------------------------------|
| NS3    | 1a       | forward          | CGAYGGAATGGTCTCCAAG         | 3386–3404        | Nejabat et al., 2019                       |
|        |          | reverse          | CRGCAACRGAGGGGTTGAG         | 4101–4119        | Nejabat et al., 2019                       |
|        | 1b       | forward          | ACSGCRGCRTGYGGGGAC          | 3309–3326        | Vallet et al., 2011                        |
|        |          | reverse          | GTGCTCTTRCCGCTRCCRGT        | 4035–4054        | Vallet et al., 2011                        |
|        | 3a       | forward          | ATACAGCGGCTTGCGGAG          | 3307–3325        | primer design (Ye et al., 2012)            |
|        |          | reverse          | GCAGGAGGAGTTGAATTGTC        | 3975–3995        | primer design (Ye et al., 2012)            |
| NS5A   | 1a       | forward          | TGGATGAACCGGCTGATAG         | 6084–6102        | Dietz et al., 2018                         |
|        |          | reverse          | ATGTTGCCGCCCATCTC           | 7047–7063        | Dietz et al., 2018                         |
|        | 1b       | forward          | TCCCCACGCACTAYGTG           | 6129–6146        | McCormick et al., 2015                     |
|        |          | reverse          | CTRGCYGARGAGCTGGCC          | 6935–6952        | McCormick et al., 2015                     |
|        | 3a       | forward          | GCTCATCGCGTTGCGATCC         | 6095–6114        | primer design (Ye et al., 2012)            |
|        |          | reverse          | CCTATGCGTCTGGCAAGTGG        | 7005–7025        | primer design (Ye et al., 2012)            |
| NS5B   | 1a       | forward          | TCGTGTGYTGCTCRATG           | 7591–7607        | Peres-da-Silva, de Almeida and Lampe, 2017 |
|        |          | reverse          | TACCTGGTCATAGCCTCC          | 8621–8638        | Peres-da-Silva, de Almeida and Lampe, 2017 |
|        | 1b       | forward          | TCYTGGTCTACYGTRAG           | 7551–7568        | Peres-da-Silva, de Almeida and Lampe, 2017 |
|        |          | reverse          | CCTAGTCATAGCCTCCGT          | 8619–8636        | Peres-da-Silva, de Almeida and Lampe, 2017 |
|        | 3a       | forward          | CGACTCTTGGTCCACCGTTAG       | 7590–7611        | primer design (Ye et al., 2012)            |
|        |          | reverse          | GCTCTCAGGGCTGCTCTATC        | 8595–8615        | primer design (Ye et al., 2012)            |
|        | 1a/1b/3a | forward          | ACCCGCTGYTTYGACTCVAC        | 8262–8281        | Akaberi, 2018                              |
|        |          | reverse          | GACASGCTGWGATADATGTC        | 9276–9295        | Akaberi, 2018                              |

\*: according to H77 reference sequence (*GenBank* accession number: AF009606)

**Table S3.** Representative HCV reference sequences used for phylogenetic analyses.

| Genotype | Subtype | GenBank Accession Number |
|----------|---------|--------------------------|
| 1        | 1a      | AF009606                 |
|          |         | M62321                   |
|          |         | M67463                   |
|          |         | HQ850279                 |
|          |         | EF407457                 |
|          | 1b      | D90208                   |
|          |         | M58335                   |
|          |         | EU781827                 |
|          |         | EU781828                 |
|          | 1c      | D14853                   |
|          |         | AY051292                 |
|          |         | AY651061                 |
|          | 1d      | KJ439768                 |
|          | 1e      | KC248194                 |
|          | 1g      | AM910652                 |
|          | 1h      | KC248198                 |
|          |         | KC248199                 |
|          | 1i      | KJ439772                 |
|          | 1j      | KJ439773                 |
|          | 1k      | KJ439774                 |
|          | 1l      | KC248193                 |
|          |         | KC248197                 |
|          |         | KC248196                 |
|          | 1m      | KJ439778                 |
|          |         | KJ439782                 |
|          | 1n      | KJ439781                 |
|          |         | KJ439775                 |
|          | 1o      | KJ439779                 |
|          |         | MH885469                 |
| 2        | 2a      | D00944                   |
|          |         | AB047639                 |
|          |         | HQ639944                 |
|          | 2b      | D10988                   |
|          |         | AB030907                 |
|          | 2c      | D50409                   |
|          |         | JX227949                 |
|          | 2d      | JF735114                 |
|          | 2a      | JF735120                 |
|          | 2f      | KC844042                 |
|          |         | KC844050                 |
|          | 2j      | DQ155561                 |
|          |         | HM777358                 |
|          |         | JF735113                 |
|          |         | HM777359                 |
|          | 2k      | AB031663                 |
|          |         | JX227953                 |
|          | 2m      | JF735111                 |

|   |    |          |
|---|----|----------|
|   |    | JX227967 |
|   | 2k | FN666428 |
|   |    | FN666429 |
|   | 2r | JF735115 |
|   | 2t | KC197238 |
|   | 2u | JF735112 |
| 3 | 3a | D17763   |
|   |    | D28917   |
|   |    | X76918   |
|   |    | JN714194 |
|   | 3b | D49374   |
|   |    | JQ065709 |
|   | 3d | KJ470619 |
|   | 3e | KJ470618 |
|   | 3d | JX227954 |
|   |    | JF735123 |
|   | 3h | JF735126 |
|   |    | JF735121 |
|   | 3i | FJ407092 |
|   |    | JX227955 |
|   | 3k | D63821   |
|   |    | JF735122 |
| 4 | 4a | Y11604   |
|   |    | DQ988074 |
|   |    | DQ418789 |
|   | 4b | FJ462435 |
|   | 4c | FJ462436 |
|   | 4d | DQ418786 |
|   |    | FJ462437 |
|   |    | EU392172 |
|   | 4f | EF589161 |
|   |    | EU392175 |
|   |    | EU392174 |
|   | 4g | FJ462432 |
|   |    | JX227971 |
|   | 4k | EU392173 |
|   |    | FJ462438 |
|   |    | EU392171 |
|   | 4l | FJ839870 |
|   |    | JX227957 |
|   | 4m | FJ462433 |
|   |    | JX227972 |
|   | 4n | FJ462441 |
|   |    | JX227970 |
|   | 4o | FJ462440 |
|   |    | JX227977 |
|   | 4p | FJ462431 |
|   | 4q | FJ462434 |
|   | 4r | FJ462439 |
|   |    | JX227976 |

|   |    |          |
|---|----|----------|
|   | 4s | JF735136 |
|   | 4t | FJ839869 |
|   | 4v | HQ537009 |
|   |    | JX227959 |
|   |    | HQ537008 |
|   |    | JX227960 |
|   | 4w | FJ025855 |
|   |    | FJ025856 |
| 5 | 5a | AF064490 |
|   |    | Y13184   |
| 6 | 6a | Y12083   |
|   |    | AY859526 |
|   |    | HQ639936 |
|   |    | EU246930 |
|   | 6b | D84262   |
|   | 6c | EF424629 |
|   | 6d | D84263   |
|   | 6e | DQ314805 |
|   |    | EU246932 |
|   | 6f | DQ835760 |
|   |    | EU246936 |
|   | 6g | D63822   |
|   |    | DQ314806 |
|   | 6h | D84265   |
|   | 6i | DQ835770 |
|   |    | DQ835762 |
|   | 6j | DQ835769 |
|   |    | DQ835761 |
|   | 6k | D84264   |
|   | 6l | EF424628 |
|   |    | JX183556 |
|   | 6m | DQ835767 |
|   |    | DQ835766 |
|   | 6n | DQ278894 |
|   |    | DQ835768 |
|   |    | EU246938 |
|   | 6o | EF424627 |
|   |    | EU246934 |
|   | 6p | EF424626 |
|   | 6q | EF424625 |
|   | 6r | EU408328 |
|   | 6s | EU408329 |
|   | 6t | EF632071 |
|   | 6t | EU246939 |
|   | 6u | EU246940 |
|   | 6v | EU798760 |
|   |    | EU798761 |
|   | 6w | DQ278892 |
|   |    | EU643834 |
|   |    | EU643836 |

|   |    |          |
|---|----|----------|
| 7 | 7a | EF108306 |
|   | 7b | KX092342 |
| 8 | 8a | MH590698 |
|   |    | MH590699 |
|   |    | MH590700 |
|   |    | MH590701 |

**Table S4.** Log (BF) calculations of various combinations of three demographic models of population growth and three models of molecular clock for subtype 1a, 1b and 3a sequences.

| subtype 1a  |          |          |          |             |             |             |             |             |
|-------------|----------|----------|----------|-------------|-------------|-------------|-------------|-------------|
| log (BF)    | SMC + CP | SMC + EP | SMC + BS | RMC/LD + CP | RMC/LD + EP | RMC/LD + BS | RMC/ED + EP | RMC/ED + BS |
| SMC + CP    | 0        | -86.8    | -108.8   | -111.9      | -196.7      | -208.2      | -148.3      | -160.2      |
| SMC + EP    | 86.8     | 0        | -22      | -25.1       | -109.9      | -121.4      | -61.6       | -73.5       |
| SMC + BS    | 108.8    | 22       | 0        | -3.1        | -87.9       | -99.4       | -39.6       | -51.5       |
| RMC/LD + CP | 111.9    | 25.1     | 3.1      | 0           | -84.6       | -96.3       | -132.8      | -48.4       |
| RMC/LD + EP | 196.7    | 109.9    | 87.9     | 84.6        | 0           | -11.5       | 48.3        | 36.4        |
| RMC/LD + BS | 208.2    | 121.4    | 99.4     | 96.3        | 11.5        | 0           | 59.8        | 47.9        |
| RMC/ED + EP | 148.3    | 61.6     | 39.6     | 132.8       | -48.3       | -59.8       | 0           | -11.9       |
| RMC/ED + BS | 160.2    | 73.5     | 51.5     | 48.4        | -36.4       | -47.9       | 11.9        | 0           |
| subtype 1b  |          |          |          |             |             |             |             |             |
| log (BF)    | SMC + CP | SMC + EP | SMC + BS | RMC/LD + CP | RMC/LD + EP | RMC/LD + BS | RMC/ED + EP | RMC/ED + BS |
| SMC + CP    | 0        | -80      | -101.1   | -49.3       | -134.1      | -157.3      | -89.8       | -98.1       |
| SMC + EP    | 80       | 0        | -21.1    | 30.7        | -54.2       | -77.4       | -9.8        | -18.1       |
| SMC + BS    | 101.1    | 21.1     | 0        | 51.8        | -33         | -56.2       | 11.3        | 3.1         |
| RMC/LD + CP | 49.3     | -30.7    | -51.8    | 0           | -84.8       | -108        | -41.5       | -48.7       |
| RMC/LD + EP | 134.1    | 54.2     | 33.1     | 84.8        | 0           | -23.2       | 44.4        | 36.1        |
| RMC/LD + BS | 157.3    | 77.4     | 56.2     | 108         | 23.2        | 0           | 67.6        | 59.3        |
| RMC/ED + EP | 89.8     | 9.8      | -11.3    | 41.5        | -44.4       | -67.6       | 0           | -8.3        |
| RMC/ED + BS | 98.1     | 18.1     | -3.1     | 48.7        | -36.1       | -59.3       | 8.3         | 0           |
| subtype 3a  |          |          |          |             |             |             |             |             |
| log (BF)    | SMC + CP | SMC + EP | SMC + BS | RMC/LD + CP | RMC/LD + EP | RMC/LD + BS | RMC/ED + EP | RMC/ED + BS |
| SMC + CP    | 0        | -105.3   | -121.1   | -79.4       | -185.9      | -214.2      | -142.1      | ***         |
| SMC + EP    | 105.3    | 0        | -15.8    | 25.9        | -80.7       | -109        | -36.8       | ***         |
| SMC + BS    | 121.1    | 15.8     | 0        | 41.7        | -64.8       | -93.1       | -21         | ***         |
| RMC/LD + CP | 79.4     | -25.8    | -41.7    | 0           | -106.5      | -134.8      | -62.7       | ***         |
| RMC/LD + EP | 185.9    | 80.7     | 64.8     | 106.5       | 0           | -28.3       | 43.9        | ***         |
| RMC/LD + BS | 214.2    | 109      | 93.1     | 134.8       | 28.3        | 0           | 72.2        | ***         |
| RMC/ED + EP | 142.1    | 36.8     | 21       | 62.7        | -43.9       | -72.2       | 0           | ***         |
| RMC/ED + BS | ***      | ***      | ***      | ***         | ***         | ***         | ***         | ***         |

BF: Bayes factor; SMC: strict molecular clock; RMC/LD: relaxed molecular clock with an uncorrelated log normal rate distribution; RMC/ED: relaxed molecular clock with an uncorrelated exponential rate distribution; CP: constant population; EP:exponential population; BS: Bayesian skyline; \*\*\*: model did not converge

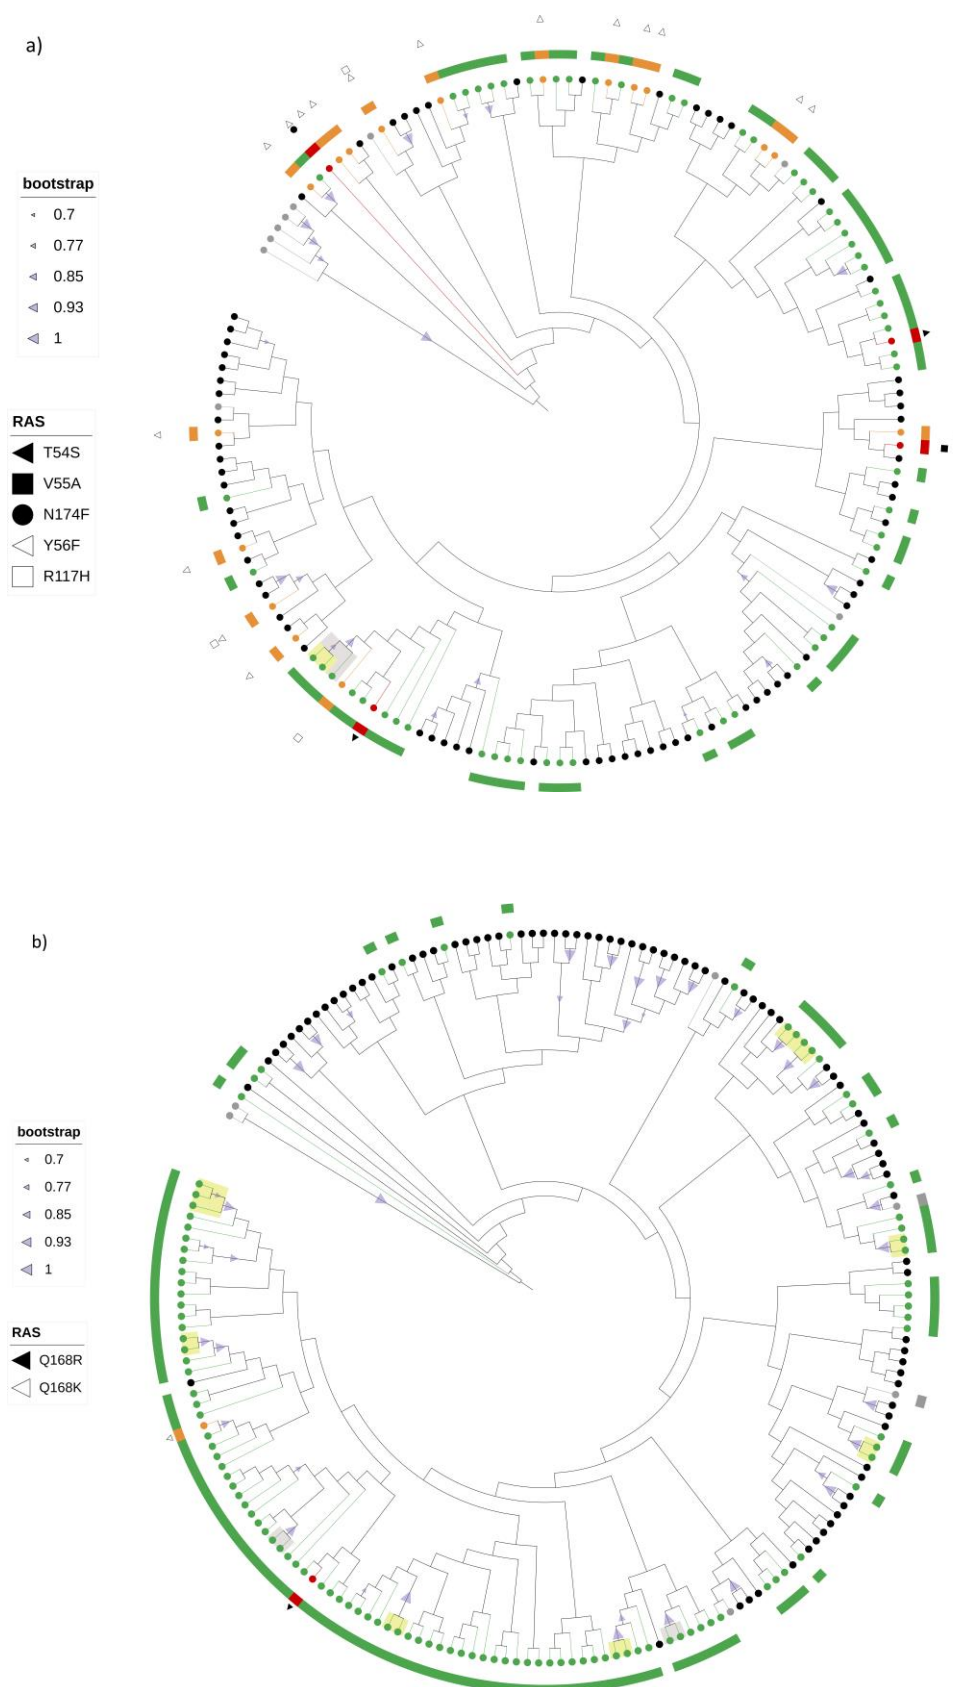

**Figure S1.** Maximum likelihood phylogenetic analysis of the NS3 gene sequences of a) HCV 1b subtype constructed with GTR+G+I model b) HCV 3a subtype constructed with K2+G+I model. Bootstrap values between 70 and 100% are displayed at the branch nodes as blue triangles with size corresponding to magnitude of bootstrap. Branches of two most similar control sequences per each local sequence obtained by searching the BLAST database and removing duplicates are colored black. Branches of Croatian sequences without RAS are colored green, sequences with RAS conferring resistance to DAA are colored red, and sequences with RAS associated with reduced susceptibility to DAA



are colored orange. Reference sequences are colored gray. All identified RAS are positioned on the phylogenetic tree along with the corresponding sequences. Resistance conferring RAS are marked with filled symbols, while RAS causing reduced susceptibility to at least one DAA are marked with open symbols. Identified transmission pairs are highlighted grey, while transmission pairs identified consistently across all genomic regions are highlighted yellow.

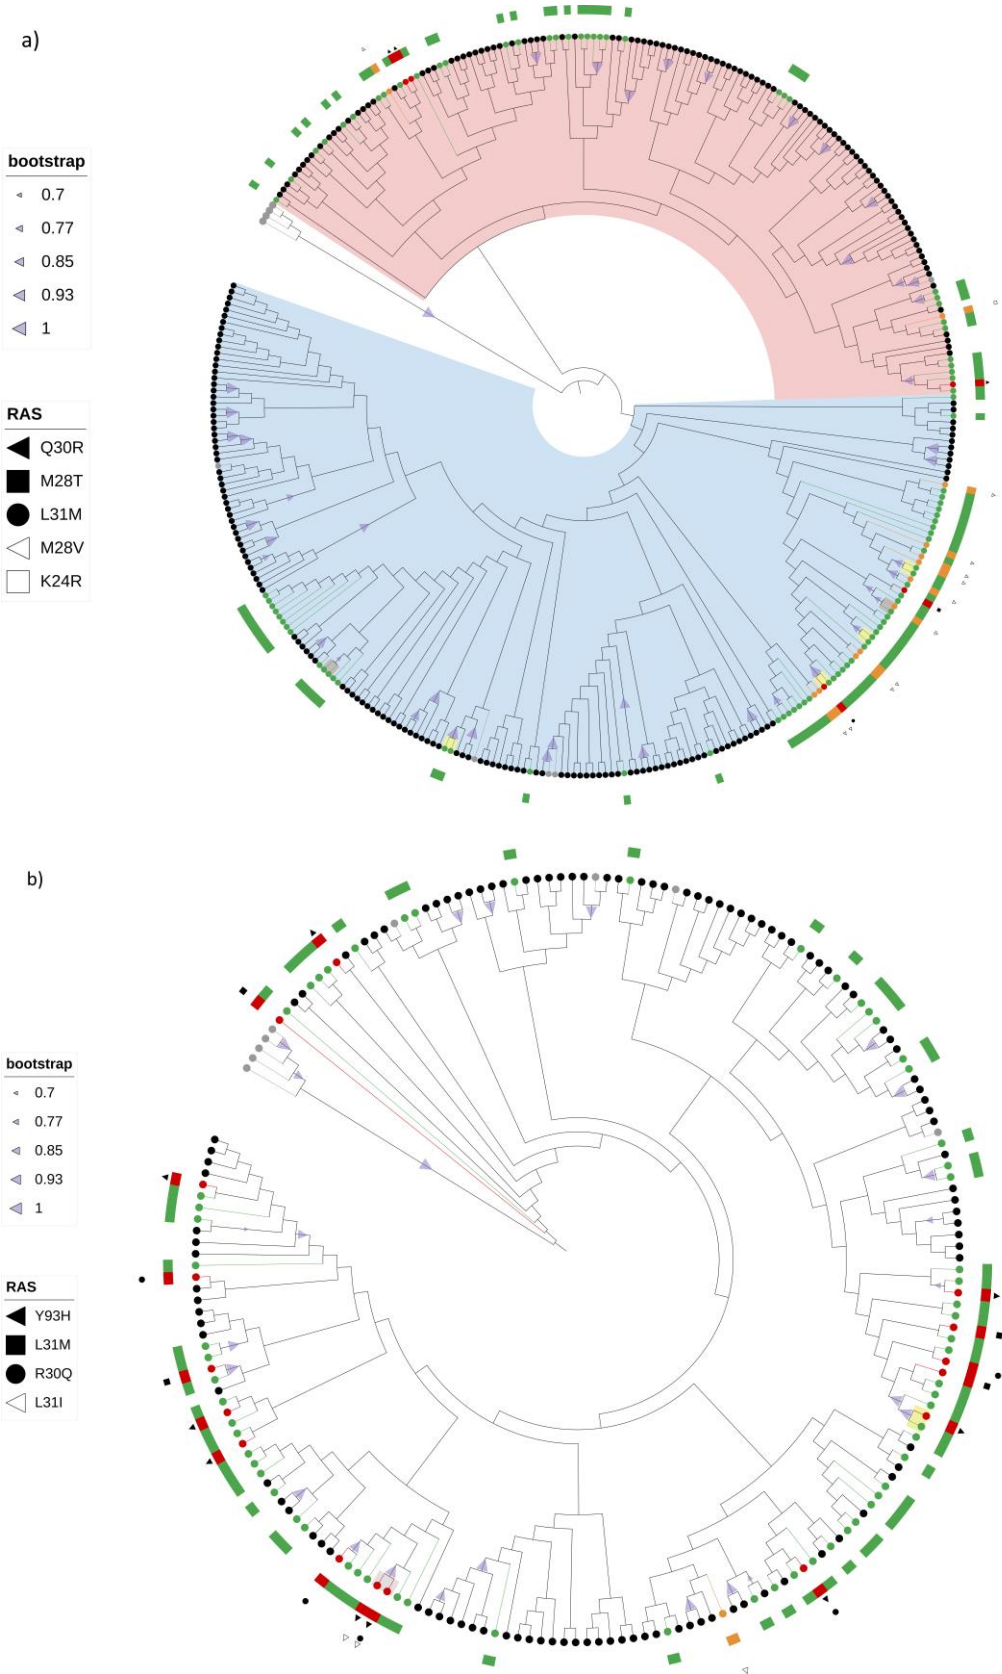

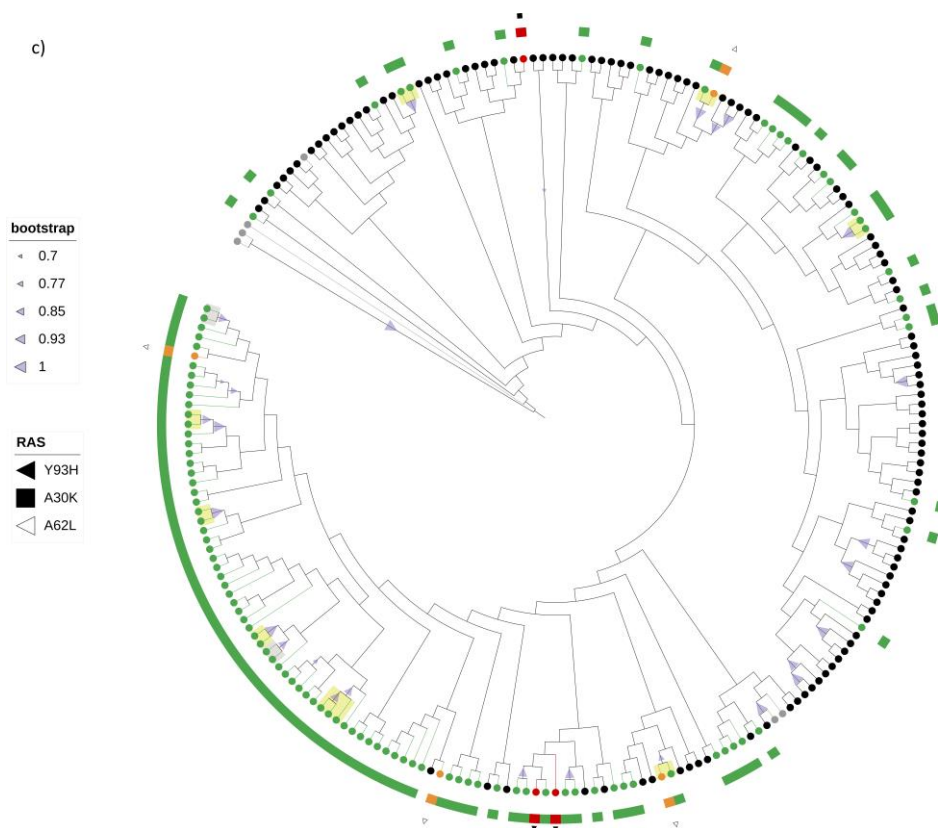

**Figure S2.** Maximum likelihood phylogenetic analysis of the NS5A gene sequences of a) HCV 1a subtype constructed with T92+G+I model b) HCV 1b subtype constructed with T92+G+I model c) HCV 3a subtype constructed with K2+G+I model. Bootstrap values between 70 and 100% are displayed at the branch nodes as blue triangles with size corresponding to magnitude of bootstrap. Branches of two most similar control sequences per each local sequence obtained by searching the BLAST database and removing duplicates are colored black. Branches of Croatian sequences without RAS are colored green, sequences with RAS conferring resistance to DAA are colored red, and sequences with RAS associated with reduced susceptibility to DAA are colored orange. Reference sequences are colored gray. Clade I sequences are highlighted blue, while clade II sequences are highlighted pink. All identified RAS are positioned on the phylogenetic tree along with the corresponding sequences. Resistance conferring RAS are marked with filled symbols, while RAS causing reduced susceptibility to at least one DAA are marked with open symbols. Identified transmission pairs are highlighted grey, while transmission pairs identified consistently across all genomic regions are highlighted yellow.

a)

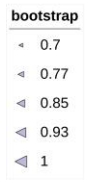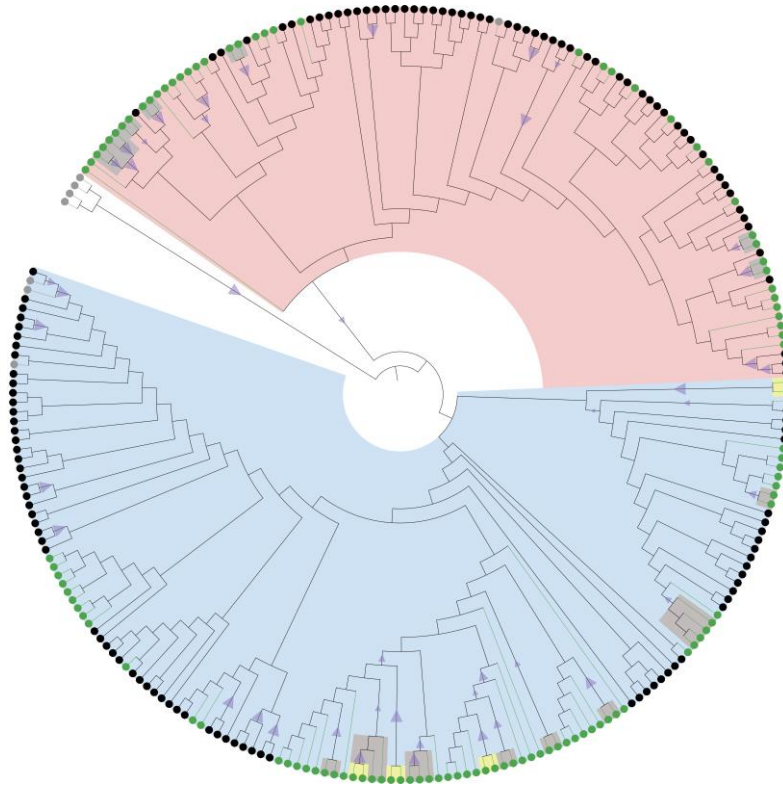

b)

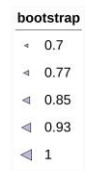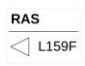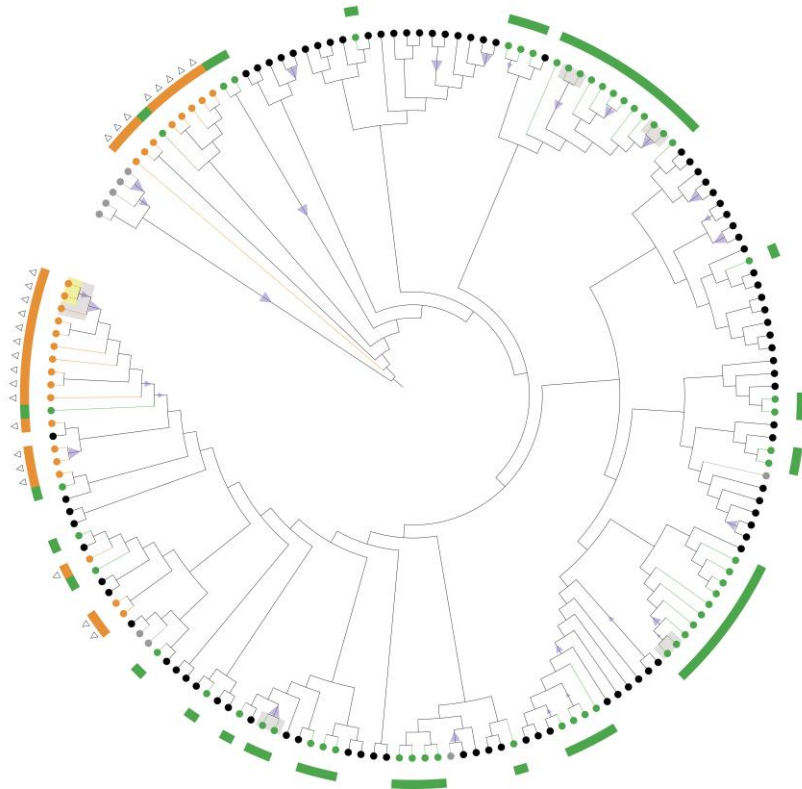

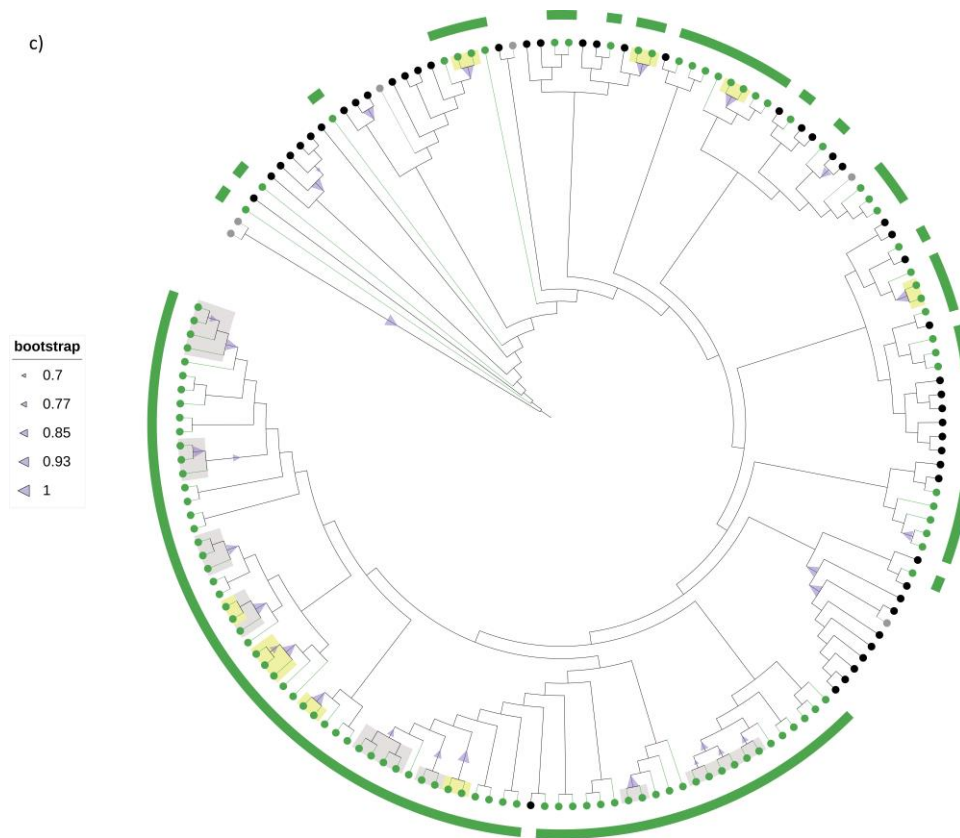

**Figure S3.** Maximum likelihood phylogenetic analysis of the NS5B gene sequences of a) HCV 1a subtype constructed with GTR+G+I model b) HCV 1b subtype constructed with K2+G+I model c) HCV 3a subtype constructed with K2+G+I model. Bootstrap values between 70 and 100% are displayed at the branch nodes as blue triangles with size corresponding to magnitude of bootstrap. Branches of two most similar control sequences per each local sequence obtained by searching the BLAST database and removing duplicates are colored black. Branches of Croatian sequences without RAS are colored green, sequences with RAS conferring resistance to DAA are colored red, and sequences with RAS associated with reduced susceptibility to DAA are colored orange. Reference sequences are colored gray. Clade I sequences are highlighted blue, while clade II sequences are highlighted pink. All identified RAS are positioned on the phylogenetic tree along with the corresponding sequences. Resistance conferring RAS are marked with filled symbols, while RAS causing reduced susceptibility to at least one DAA are marked with open symbols. Identified transmission pairs are highlighted grey, while transmission pairs identified consistently across all genomic regions are highlighted yellow.
